# Supplementary material for: Impact of Harvest Time and Pruning Technique on Total CBD Concentration and Yield of Medicinal Cannabis
Source: MDPI journal article supplement (doi:10.3390/plants11010140), 2022-01-05
Supplement: s1 [file s1]

## Supplementary material

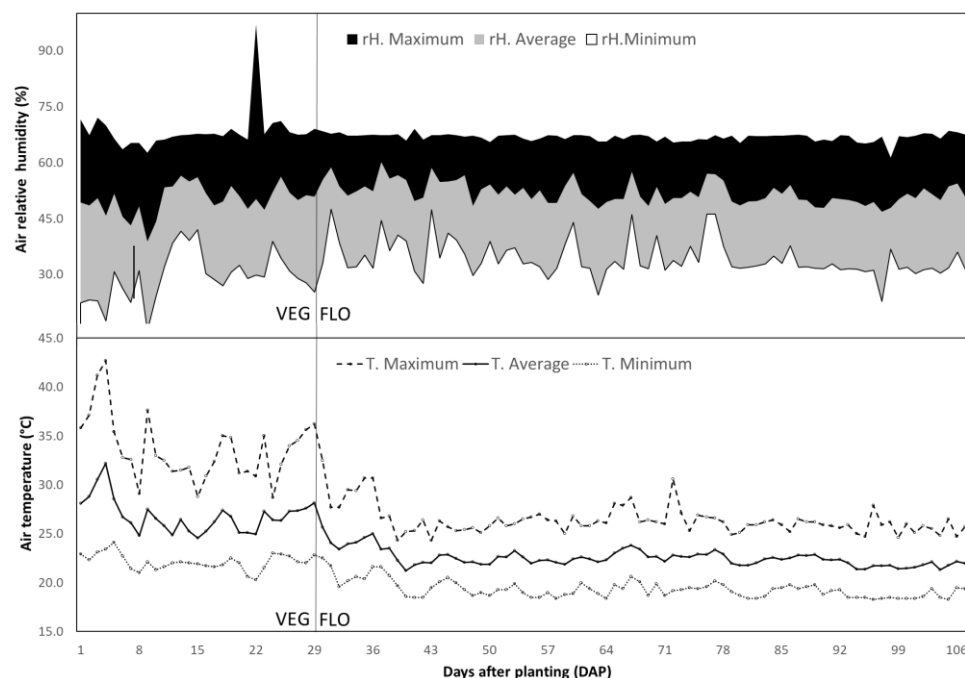

**Figure S1.** Histogram with environment data collected by greenhouse sensors during the cultivation period, represented in x axis as days after planting (DAP). The upper graph plots daily averages mean, maximum and minimum air relative humidity (rH %). The lower graph plots daily averages mean, maximum and minimum air temperature (°C). The vertical bar indicates the correspondent vegetative period (VEG) and the generative period (FLO), the shift to a short-day photoperiod happened at DAP 29.

**Table S1.** Summary of p-values for the analyzed traits for factors HT, PT and the interactions HT\*PT.

| p values for analyzed traits                         | Factors |        |        |
|------------------------------------------------------|---------|--------|--------|
|                                                      | HT      | PT     | HT*PT  |
| Inflorescence fresh weight (mg.plant <sup>-1</sup> ) | <.0001  | 0.2243 | 0.0215 |
| CBDA %                                               | 0.2703  | 0.3026 | 0.7769 |
| CBD %                                                | <.0001  | 0.1142 | 0.5955 |
| total CBD %                                          | 0.2767  | 0.2972 | 0.7842 |
| total CBD Yield (mg.plant <sup>-1</sup> )            | <.0001  | 0.0923 | 0.6811 |
| Inflorescences dry weight (g.plant <sup>-1</sup> )   | -       | 0.0117 | -      |
| Leaves dry weight (g.plant <sup>-1</sup> )           | -       | 0.0052 | -      |
| Stems dry weight (g.plant <sup>-1</sup> )            | -       | 0.1005 | -      |

**Table S2.** Fertilization scheme. The total amount of products (ml) per plant is presented for each organic fertilizer (R – BioCanna Rhizotonic, V - BioCanna Vega, F - BioCanna Flores, B - BioCanna Boost) used during the entire cultivation period (VEG+FLO). Additionally, the amount of fertilizer provided in each harvest time is declared together with the amounts for VEG (vegetative period) and FLO (generative period) solely.

| Experiment | HT | DAP | Amounts (ml of product per plant) |     |      |      | Total<br>fertilizer       | VEG<br>fertilizer | FLO<br>fertilizer |
|------------|----|-----|-----------------------------------|-----|------|------|---------------------------|-------------------|-------------------|
|            |    |     | R                                 | V   | F    | B    | (ml plant <sup>-1</sup> ) | R + V             | F + B             |
| Total      |    |     | 7.8                               | 4.5 | 26.9 | 20.0 | 59.2                      | 12.3              | 46.9              |
|            | 1  | 65  |                                   |     | 8.9  | 9.3  |                           |                   | 18.2              |
|            | 2  | 79  |                                   |     | 16.2 | 15.5 |                           |                   | 31.6              |
|            | 3  | 93  |                                   |     | 24.3 | 20.0 |                           |                   | 44.3              |
|            | 4  | 107 |                                   |     | 26.9 | 20.0 |                           |                   | 46.9              |
